# Supplementary material
Source: HighWire-hosted journal article supplement (https://spcare.bmj.com/content/9/3/300)
Supplement: inline-supplementary-material-1 [file inline-supplementary-material-1.pdf]

**Costs of Family Caregiving (COFAC)  
Questionnaire:**

A questionnaire to explore the financial and emotional costs of caregiving in palliative care

**Carer Questionnaire (to be completed by caregivers with a researcher to assist): Baseline Interview**

*'Carers may or may not be family members, they are lay people in a close supportive role who share in the illness experience of the patient and undertake vital care work and emotional management'*

Participant ID:

Date of completion:

## Section 1: Demographic details

### 1. Gender

Male

Female

### 2. What is your date of birth?

### 3. What is your ethnic group?

White

Mixed/Multiple ethnic groups

Asian/Asian British

Black/ African/Caribbean/Black British

Other ethnic group

### 4. What is your postcode?

### 5. What is the highest level of education that you have completed?

No formal education

Advanced cert/apprenticeship/  
professional qualification

Primary school

Bachelor degree

Secondary school

Masters/Postgrad diploma

Technical or vocational

Doctorate (PhD)

**6. What is your current job, or your last job if not working?**

**7. Does your household own or rent your accommodation?**

Owns with mortgage

Rents

Owns outright

Other e.g. equity release

**8. Do you currently have private health insurance e.g. BUPA, Westfield?**

Yes

No

**9. What was your total household income (before tax) for the past year, including any money from benefits, contributions from parents/children etc?**

Nil

£32,000 to £39,999

£1 to £7,999

£40,000 to £46,999

£8,000 to £15,999

£47,000 or more

£16,000 to £23,999

Don't know

£24,000 to £31,999

Prefer not to answer

**10. How many people are dependent on this income?**

---

**11. What is your relationship to [patient name]?**

- |                                                      |                                                  |
|------------------------------------------------------|--------------------------------------------------|
| <input type="checkbox"/> He/she is my spouse/partner | <input type="checkbox"/> He/she is my sibling    |
| <input type="checkbox"/> He/she is my son/daughter   | <input type="checkbox"/> He/she is my friend     |
| <input type="checkbox"/> He/she is my parent         | <input type="checkbox"/> Other (please specify): |

**12. What is [patients] gender?**

- Male  Female

**13. What is [patients] date of birth?**

**14. Can you tell me what condition or illness [patient] has been diagnosed with?**

## Section 2: Work-Related Costs

### 15. How would you describe your present status?

- |                                                  |                                                                                 |
|--------------------------------------------------|---------------------------------------------------------------------------------|
| <input type="checkbox"/> Employed                | <input type="checkbox"/> Self-employed                                          |
| <input type="checkbox"/> Retired from employment | <input type="checkbox"/> Looking after home/family                              |
| <input type="checkbox"/> Unemployed              | <input type="checkbox"/> Unable to work due to permanent sickness or disability |
| <input type="checkbox"/> Student/pupil           | <input type="checkbox"/> Other (please specify)                                 |

### 16. Has there been any change in your employment status as a result of your caregiving role? E.g. early retirement, resignation, reduction in working hours.

- Yes  No

If yes, what was the change? \_\_\_\_\_

### 17. If employed/self-employed, have you taken any time off work in the last month to care for (patient), including taking them to hospital appointments etc?

- Yes  No  n/a

If yes, how many hours per week on average over the last month

\_\_\_\_\_

If yes, was this time off work:

- Paid  Unpaid  Reduced pay

**18. In the last month, have you lost any pension rights or other benefits (e.g. Working Tax Credits, Job Seekers Allowance) as a result of caregiving?**

Yes

No

Don't know

**If yes,** how much do you estimate this loss to be over the last month?

£ \_\_\_\_\_

## Section 3: Caregiver Time costs

19. Do you live with [patient]?

Yes

No

If no, how much did you spend over the last month on travel to visit [patient]?

|                                 |        |
|---------------------------------|--------|
| Cost of Public Transport        | £      |
| Cost of taxis                   | £      |
| Cost of parking                 | £      |
| Miles travelled in your own car | Miles: |

20. Over the last month, how many hours of care have you provided each week for [patient]?

| Type of caregiving                                  | Hours <u>per week</u> , over the last month |
|-----------------------------------------------------|---------------------------------------------|
| Personal care (washing, feeding, moving etc)        |                                             |
| Making appointments and taking to/from appointments |                                             |
| Household tasks (washing, cleaning, shopping etc)   |                                             |
| Managing finances or other paperwork                |                                             |
| Collecting prescriptions                            |                                             |
| Spending time together/with family                  |                                             |
| Other                                               |                                             |

**21. Over the last month, have any other family members or friends provided care for [patient]?**

Yes       No       Don't know

**If yes,** how many hours of care did they provide each week (over the last month)?

\_\_\_\_\_

Please estimate any costs that they incurred as a result of providing this care (over the last month)?

\_\_\_\_\_

**22. Do you receive any of the following benefits because of your caregiving role?**

| Benefit              | Do you receive this?<br>yes/no/don't know | Approx. amount <i>per month</i> (£) |
|----------------------|-------------------------------------------|-------------------------------------|
| Attendance allowance |                                           |                                     |
| Carers allowance     |                                           |                                     |
| Carers credit        |                                           |                                     |
| Carers premium       |                                           |                                     |
| Other                |                                           |                                     |

**If no,** are you are eligible for any of these benefits?

Yes       No       Don't Know

**23. In the last month, have you had to pay someone to look after any other dependants (e.g. children) while you were caring for [patient]?**

Yes       No

**If yes,** how much did you pay in the past month?



## Section 4: Out of Pocket Expenses

24. Over the last month, have you employed any paid carers for [patient]?

Yes

No

If yes, how much was the cost in the last month? \_\_\_\_\_

How much did you pay (if any)? \_\_\_\_\_

25. Over the last month, have you paid for any private healthcare (other than health insurance premiums) for [patient] e.g. private medical consultations, physio, private ambulance?

Yes

No

If yes, how much was the cost in the last month? \_\_\_\_\_

How much did you pay (if any)? \_\_\_\_\_

26. Over the last month, have you paid for any respite care for [patient name] (*respite care is any care to give rest or relief to unpaid carers*)?

Yes

No

If yes, how much did it cost in the last month? \_\_\_\_\_

How much did you pay (if any)? \_\_\_\_\_

27. Over the last month, has [patient] spent any time in care/nursing home?

Yes

No

If yes, how much did it cost in the last month? \_\_\_\_\_

How much did you pay (if any)? \_\_\_\_\_

**28. In the last month, have you paid for any of the following aids, appliances and modifications due to [patients] condition? Please only include items that you have paid for.**

| Aid                                                                                                       | Description | What was the cost to you? |
|-----------------------------------------------------------------------------------------------------------|-------------|---------------------------|
| <b>Walking aids</b> (e.g. stick/crutch, wheelchair, scooter)                                              |             |                           |
| <b>Communications aids</b> (e.g. tablet, lightwriter, phone systems)                                      |             |                           |
| <b>Respiratory Aids</b> (e.g. home oxygen, NIV machine)                                                   |             |                           |
| <b>Posture aids</b> (e.g. back support, cushions, chair pad)                                              |             |                           |
| <b>Home living aids</b> (lifting/reclining armchair, stair lift, bath lift, shower seat, raisers for bed) |             |                           |
| <b>Pain relief</b> (e.g. TENS machine)                                                                    |             |                           |
| <b>Incontinence aids</b> (pads, pants, waterproof sheets/chair covers)                                    |             |                           |
| <b>Feeding aids</b> (bibs, wipes, cups)                                                                   |             |                           |
| <b>Personal alarms</b> (Lifeline, citywide alarm etc.)                                                    |             |                           |
| <b>Additional homeware</b> (clothes, bed linen, towels, new TV etc.)                                      |             |                           |
| <b>Home modifications</b> (ramps, rails, home extensions)                                                 |             |                           |
| <b>Car modifications</b> (wheel chair lift, boot hoist)                                                   |             |                           |
| <b>Other aids, appliances or modifications?</b>                                                           |             |                           |

**29. In the last month have you spent any money on the following when taking [patient] to appointments at hospital, hospice, GP surgery or elsewhere?**

| <b>Cost</b>                                                                                                                                                                         | <b>Amount spent in the past month/mileage</b> |
|-------------------------------------------------------------------------------------------------------------------------------------------------------------------------------------|-----------------------------------------------|
| Transport to appointments at hospital/hospice/<br>GP surgery<br><br>Miles travelled in your own car:<br><br>Cost of public transport:<br><br>Cost of taxis:<br><br>Cost of parking: |                                               |
| Transport to pharmacy to collect prescriptions<br><br>Miles travelled in your own car:<br><br>Cost of public transport:<br><br>Cost of taxis:<br><br>Cost of parking:               |                                               |
| Parking                                                                                                                                                                             |                                               |
| Food and drink at hospital, hospice or elsewhere                                                                                                                                    |                                               |
| Accommodation to be close to hospital, hospice or elsewhere                                                                                                                         |                                               |
| Other costs (please specify)                                                                                                                                                        |                                               |

**30. How much *extra* (if any) have you spent on each of the following items in the last month compared to before [patient name] became ill? If you do not know the actual cost please describe your change in usage.**

|                            | Extra usage/costs in the last month |
|----------------------------|-------------------------------------|
| Telephone/internet charges |                                     |
| Electricity and heating    |                                     |
| Food and drink             |                                     |
| Cleaners or laundry costs  |                                     |
| Other                      |                                     |

**31. In the last month how much have you spent on prescription charges for [patient]?**

£

**32. In the last month how much have you spent on over the counter medications or therapies for [patient] e.g. paracetamol, indigestion meds?**

£

**33. In the last month how much have you spent on complementary or alternative medicines/therapies for [patient] e.g. homeopathy, acupuncture, Chinese medicines?**

£

## Section 5: Your own health

**34. In the last month, have you incurred any costs relating to health problems of your own that have occurred as a result of your caring role e.g. injuries from lifting?**

| Nature of cost e.g. physio for back injury | Cost in the last month |
|--------------------------------------------|------------------------|
|                                            |                        |

**35. In the last month, have you incurred any costs relating to preventative therapies or respite from caring e.g. osteopath, relaxation massage?**

| Nature of cost e.g. osteopath | Cost in the last month |
|-------------------------------|------------------------|
|                               |                        |

**36. Can you think of ANY other costs that have been incurred over the last month as a consequence of [patients] illness? E.g. legal costs**

| What are the costs? | How much was the cost? | Who paid? |
|---------------------|------------------------|-----------|
|                     |                        |           |
